# Supplementary material for: Severe acute respiratory syndrome coronavirus 2 (SARS-CoV-2) seroprevalence: Navigating the absence of a gold standard
Source: medRxiv preprint, doi:10.1101/2021.05.11.21256992, version 1 (2021-05-12)
Supplement: Supplemental Tables and Figures [file 256992_file02.pdf]

## Supplemental material

**Supplemental Figure 1.** Signal to cut off ratio (S/Co) by calendar month April (4) until September (9). Red lines represent thresholds. Abbott-NP (1.4) (n=54 positive) based on the manufacture's recommendations. Spike (0.190) (n=228 positive); RBD (0.186) (n=104 positive); and NP (0.396) (n=214 positive). Abbott- Architect SARS-Cov-2 IgG assay which targets the nucleocapsid antigen and three in-house IgG ELISA chemiluminescent assays recognizing distinct recombinant viral antigens: full length spike glycoprotein (Spike), spike glycoprotein receptor binding domain (RBD), and nucleocapsid (NP).

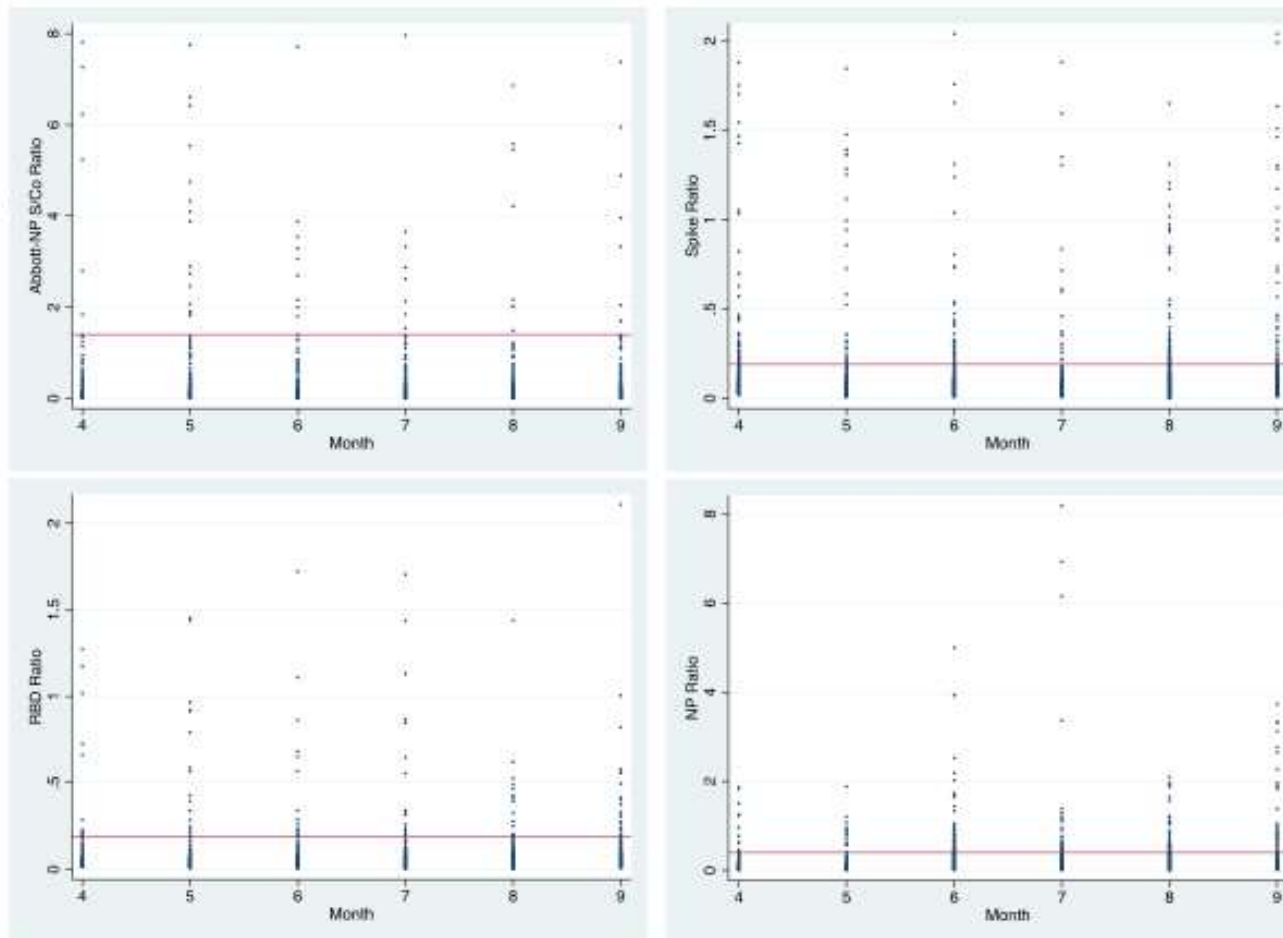

**Supplemental Table 1. Baseline Characteristics of blood donor populations over time**

|           |                  | Overall     |            | April     | May       | June      | July      | Aug        | Sept      |
|-----------|------------------|-------------|------------|-----------|-----------|-----------|-----------|------------|-----------|
| Province  |                  |             |            |           |           |           |           |            |           |
|           | British Columbia | <b>1358</b> | <b>15%</b> | 228 (15%) | 228 (15%) | 227 (15%) | 229 (15%) | 228 (15%)  | 218 (14%) |
|           | Alberta          | <b>1862</b> | <b>21%</b> | 309 (21%) | 309 (21%) | 309 (21%) | 308 (21%) | 308 (21%)  | 319 (21%) |
|           | Saskatchewan     | <b>439</b>  | <b>5%</b>  | 77 (5%)   | 54 (4%)   | 77 (5%)   | 77 (5%)   | 77 (5%)    | 77 (5%)   |
|           | Manitoba         | <b>496</b>  | <b>6%</b>  | 79 (5%)   | 102 (7%)  | 80 (5%)   | 78 (5%)   | 78 (5%)    | 79 (5%)   |
|           | Ontario          | <b>3889</b> | <b>43%</b> | 648 (43%) | 647 (43%) | 648 (43%) | 649 (43%) | 649 (43%)  | 648 (43%) |
|           | Atlantic         | <b>955</b>  | <b>11%</b> | 159 (11%) | 159 (11%) | 159 (11%) | 159 (11%) | 160 (11%)  | 159 (11%) |
| Age group |                  |             |            |           |           |           |           |            |           |
|           | 17-19            | <b>185</b>  | <b>2%</b>  | 23 (2%)   | 19 (1%)   | 36 (2%)   | 33 (2%)   | 44 (3%)    | 30 (2%)   |
|           | 20-29            | <b>1525</b> | <b>17%</b> | 253 (17%) | 248 (17%) | 240 (16%) | 232 (15%) | 286 (19%)  | 266 (18%) |
|           | 30-39            | <b>1655</b> | <b>18%</b> | 286 (19%) | 270 (18%) | 284 (19%) | 255 (17%) | 244 (16%)  | 316 (21%) |
|           | 40-49            | <b>1453</b> | <b>16%</b> | 249 (17%) | 247 (16%) | 207 (14%) | 233 (16%) | 271 (18%)  | 246 (16%) |
|           | 50-59            | <b>1895</b> | <b>21%</b> | 336 (22%) | 319 (21%) | 338 (23%) | 333 (22%) | 292 (19%)  | 277 (18%) |
|           | 60-69            | <b>1728</b> | <b>19%</b> | 284 (19%) | 300 (20%) | 282 (19%) | 312 (21%) | 276 (18%)  | 274 (18%) |
|           | 70-79            | <b>518</b>  | <b>6%</b>  | 66 (4%)   | 90 (6%)   | 103 (7%)  | 95 (6%)   | 77 (5%)    | 87 (6%)   |
|           | 80+              | <b>40</b>   | <b>0%</b>  | 3 (0%)    | 6 (1%)    | 10 (1%)   | 7 (0%)    | 10 (1%)    | 4 (0%)    |
| Sex       |                  |             |            |           |           |           |           |            |           |
|           | Female           | <b>4250</b> | <b>47%</b> | 719 (48%) | 699 (47%) | 669 (45%) | 725 (48%) | 728 (49%)  | 710 (47%) |
|           | Male             | <b>4749</b> | <b>53%</b> | 781 (52%) | 800 (53%) | 831 (55%) | 775 (52%) | 772 (51 %) | 790 (53%) |

**Supplemental Table 2. Assay Characteristics overall and over time; based on the BLCM Posterior Means (95% Creditable Interval),**

**Informative**

|               | Overall               |                       |                       |                        | April/May             |                       | June/July             |                       | August/September      |                        |
|---------------|-----------------------|-----------------------|-----------------------|------------------------|-----------------------|-----------------------|-----------------------|-----------------------|-----------------------|------------------------|
|               | Sensitivity           | PPV                   | Specificity           | NPV                    | Sensitivity           | Specificity           | Sensitivity           | Specificity           | Sensitivity           | Specificity            |
| Spike         | 93.5%<br>(88.7, 97.3) | 27.7%<br>(23.2, 33.7) | 98.1%<br>(97.9, 98.4) | 99.8%<br>(99.6, 100.0) | 95.0%<br>(90.1, 98.2) | 98.0%<br>(97.4, 98.4) | 93.6%<br>(88.0, 97.6) | 98.8%<br>(98.4, 99.2) | 93.6%<br>(88.0, 97.6) | 97.6%<br>(97.0, 98.1)  |
| RBD           | 89.1%<br>(84.1, 93.5) | 59.8%<br>(50.0, 71.4) | 99.5%<br>(99.3, 99.7) | 99.8%<br>(99.6, 99.9)  | 89.3%<br>(83.7, 93.8) | 99.5%<br>(99.3, 99.8) | 89.2%<br>(98.4, 99.2) | 99.6%<br>(83.6, 93.9) | 88.7%<br>(83.0, 93.4) | 99.3%<br>(99.0, 99.6)  |
| NP            | 78.8%<br>(74.1, 83.2) | 21.0%<br>(17.2, 25.3) | 98.2%<br>(97.9, 98.4) | 99.6%<br>(99.3, 99.7)  | 79.9%<br>(74.9, 84.5) | 99.5%<br>(99.2, 99.7) | 80.5%<br>(75.6, 84.9) | 97.3%<br>(96.7, 97.9) | 78.5%<br>(73.5, 83.3) | 97.6%<br>(97.1, 98.1)  |
| Abbott-<br>NP | 58.5%<br>(46.3, 70.6) | 87.5%<br>(81.3, 93.8) | 99.8%<br>(99.7, 99.9) | 99.4%<br>(99.1, 99.6)  | 77.3%<br>(58.7, 92.5) | 99.7%<br>(99.5, 99.9) | 60.2%<br>(41.2, 78.5) | 99.8%<br>(99.5, 99.9) | 64.4%<br>(45.6, 83.0) | 99.9%<br>(99.8, 100.0) |

**Supplemental Table 3. Assay Characteristics overall and over time; based on the BLCM Posterior Means (95% Creditable Interval),**

**Weakly Informative**

|               | Overall               |                       |                       |                        | April/May              |                       | June/July             |                       | August/September      |                       |
|---------------|-----------------------|-----------------------|-----------------------|------------------------|------------------------|-----------------------|-----------------------|-----------------------|-----------------------|-----------------------|
|               | Sensitivity           | PPV                   | Specificity           | NPV                    | Sensitivity            | Specificity           | Sensitivity           | Specificity           | Sensitivity           | Specificity           |
| Spike         | 92.9%<br>(83.9, 99.4) | 27.1%<br>(24.6, 29.8) | 98.1%<br>(97.8, 98.4) | 99.9%<br>(99.9, 100.0) | 96.7%<br>(87.2, 100.0) | 97.9%<br>(97.3, 98.4) | 92.0%<br>(76.9, 99.8) | 98.7%<br>(98.3, 99.1) | 92.2%<br>(77.2, 99.8) | 97.5%<br>(96.9, 98.0) |
| RBD           | 90.6%<br>(80.5, 98.1) | 57.8%<br>(51.9, 62.5) | 99.5%<br>(99.3, 99.6) | 99.9%<br>(99.9, 100.0) | 91.3%<br>(77.0, 99.0)  | 99.4%<br>(99.1, 99.7) | 93.2%<br>(77.9, 99.9) | 99.4%<br>(99.1, 99.7) | 89.7%<br>(73.5, 99.5) | 99.2%<br>(98.8, 99.5) |
| NP            | 75.8%<br>(64.6, 85.9) | 23.0%<br>(20.6, 25.7) | 98.1%<br>(97.8, 98.4) | 99.8%<br>(99.8, 99.9)  | 84.8%<br>(66.6, 97.6)  | 99.4%<br>(99.1, 99.6) | 89.4%<br>(74.1, 99.3) | 97.2%<br>(96.6, 97.8) | 70.5%<br>(52.1, 88.0) | 97.5%<br>(96.9, 98.1) |
| Abbott-<br>NP | 58.7%<br>(46.2, 71.2) | 67.2%<br>(64.8, 70.4) | 99.8%<br>(99.7, 99.9) | 99.7%<br>(99.6, 99.8)  | 79.4%<br>(59.8, 94.5)  | 99.6%<br>(99.4, 99.8) | 62.9%<br>(42.4, 82.1) | 99.6%<br>(99.4, 99.8) | 63.9%<br>(44.1, 83.9) | 99.8%<br>(99.6, 99.9) |
